# Supplementary material for: Synovial features of patients with rheumatoid arthritis and psoriatic arthritis in clinical and ultrasound remission differ under anti-TNF therapy: a clue to interpret different chances of relapse after clinical remission?
Source: PubMed Central journal article supplement — Ann Rheum Dis. 2017 Jun 9;76(7):1228–36. doi: 10.1136/annrheumdis-2016-210424 (PMC5530352; doi:10.1136/annrheumdis-2016-210424), 2017-06-09
Supplement: annrheumdis-2016-210424supp001.pdf [file annrheumdis-2016-210424supp001.pdf]

**Supplementary Table S1.** Inter-rater agreement coefficients for CD68, CD20, CD3, CD21, CD31 and collagen IHC scores.

|                                       | <b>Inter-rater coefficient*</b> |
|---------------------------------------|---------------------------------|
| <b>Lining CD68 IHC score</b>          | R=0.77; p<0.001                 |
| <b>Sublining CD68 IHC score</b>       | R=0.84; p<0.001                 |
| <b>Lining CD21 IHC score</b>          | R=0.89; p<0.001                 |
| <b>Sublining CD21 IHC score</b>       | R=0.96; p<0.001                 |
| <b>Lining CD20 IHC score</b>          | R=0.93; p<0.001                 |
| <b>Sublining CD20 IHC score</b>       | R=0.81; p<0.001                 |
| <b>Lining CD3 IHC score</b>           | R=0.92; p<0.001                 |
| <b>Sublining CD3 IHC score</b>        | R=0.81; p<0.001                 |
| <b>Lining Collagen IHC score</b>      | P=0.79; p<0.001                 |
| <b>Sublining Collagen IHC score</b>   | R=0.87; p<0.001                 |
| <b>CD31<sup>+</sup> vessels count</b> | R=0.99; p<0.001                 |

**IHC:** Immunohistochemistry. \*Pearson Correlation coefficient.
