# Supplementary material for: Synovial features of patients with rheumatoid arthritis and psoriatic arthritis in clinical and ultrasound remission differ under anti-TNF therapy: a clue to interpret different chances of relapse after clinical remission?
Source: PubMed Central journal article supplement — Ann Rheum Dis. 2017 Jun 9;76(7):1228–36. doi: 10.1136/annrheumdis-2016-210424 (PMC5530352; doi:10.1136/annrheumdis-2016-210424), 2017-06-09
Supplement: annrheumdis-2016-210424supp002.pdf [file annrheumdis-2016-210424supp002.pdf]

**Supplementary Table S2. Demographic, clinical, and histological parameters of PDUS<sup>+</sup> RA patients divided by SDAI remission status achievement.**

| PARAMETERS                                                  | PDUS <sup>+</sup> RA patients with SDAI >3.3 (n=11) | PDUS <sup>+</sup> RA patients with SDAI ≤3.3 (n=14) | <i>p</i>         |
|-------------------------------------------------------------|-----------------------------------------------------|-----------------------------------------------------|------------------|
| Age, years (mean ± SD)                                      | 58.9 ± 15.1                                         | 55.9 ± 15.2                                         | 0.62             |
| Female, n (%)                                               | 10 (90.9)                                           | 11 (78.6)                                           | 0.72             |
| Disease duration, years (mean ± SD)                         | 9.3 ± 3.6                                           | 9.1 ± 3.7                                           | 0.89             |
| Patient Global Assessment of Disease Activity, (mean ± SD)  | 4.5 ± 1.5                                           | 0.8 ± 0.1                                           | <b>&lt;0.001</b> |
| Provider Global Assessment of Disease Activity, (mean ± SD) | 0.8 ± 1.0                                           | 0.7 ± 0.9                                           | 0.15             |
| TJC28, (mean ± SD)                                          | 0.1 ± 0.3                                           | 0.0 ± 0.0                                           | 0.22             |
| TJC44, (mean ± SD)                                          | 0.3 ± 0.7                                           | 0.0 ± 0.0                                           | 0.12             |
| SJC28, (mean ± SD)                                          | 0.2 ± 0.4                                           | 0.0 ± 0.0                                           | 0.46             |
| SJC44, (mean ± SD)                                          | 0.3 ± 0.5                                           | 0.0 ± 0.0                                           | 0.21             |
| CRP, mg/l (mean ± SD)                                       | 2.0 ± 1.1                                           | 2.2 ± 2.5                                           | 0.77             |
| <hr/>                                                       |                                                     |                                                     |                  |
| Lining CD68 IHC score, (mean ± SD)                          | 1.5 ± 0.6                                           | 1.2 ± 0.4                                           | 0.17             |
| Sublining CD68 IHC score, (mean ± SD)                       | 0.6 ± 0.7                                           | 0.4 ± 0.5                                           | 0.11             |
| Lining CD3 IHC score, (mean ± SD)                           | 0.6 ± 0.6                                           | 0.3 ± 0.5                                           | 0.17             |
| Sublining CD3 IHC score, (mean ± SD)                        | 1.1 ± 0.3                                           | 1.1 ± 0.6                                           | 0.66             |
| Lining CD20 IHC score, (mean ± SD)                          | 0.4 ± 0.6                                           | 0.3 ± 0.4                                           | 0.24             |
| Sublining CD20 IHC score, (mean ± SD)                       | 1.1 ± 0.3                                           | 1.2 ± 0.6                                           | 0.29             |
| Lining CD21 IHC score, (mean ± SD)                          | 0.0 ± 0.0                                           | 0.0 ± 0.0                                           | 1.00             |
| Sublining CD21 IHC score, (mean ± SD)                       | 0.0 ± 0.0                                           | 0.0 ± 0.0                                           | 1.00             |
| CD31+ vessels, (mean ± SD)                                  | 13.3 ± 1.8                                          | 11.5 ± 4.1                                          | 0.18             |

**RA:** Rheumatoid Arthritis; **TJC:** Tender Joint Count; **SJC:** Swollen Joint Count; **CRP:** C-Reactive Protein; **IHC:** Immunohistochemistry; **PDUS:** Power Doppler Ultrasound; **SDAI:** Simplified Disease Activity Index; **SD:** Standard Deviation; **bold:** p value <0.05.
